# Supplementary material for: Environmentally friendly covalent coupling of proteins onto oxidized cellulosic materials
Source: Royal Society of Chemistry journal article supplement (doi:10.1039/c9nj03077h), 2019-01-01
Supplement: c9nj03077h1.pdf [file c9nj03077h1.pdf]

## Environmentally Friendly Covalent Coupling of Proteins onto Oxidized Cellulosic Materials

Oskar Haske-Cornelius,<sup>a</sup> Simone Weinberger,<sup>a</sup> Felice Quartinello,<sup>a</sup> Claudia Tallian,<sup>a</sup> Florian Brunner,<sup>a</sup> Alessandro Pellis,<sup>a, b, \*</sup> and Georg M. Guebitz,<sup>a, c</sup>

<sup>1</sup> Institute of Environmental Biotechnology, University of Natural Resources and Life Sciences Vienna, Konrad-Lorenz-Strasse 20, 3430 Tulln an der Donau, Austria

<sup>2</sup> Green Chemistry Centre of Excellence, Department of Chemistry, University of York, Heslington, YO10 5DD, York, UK

<sup>3</sup> Austrian Centre of Industrial Biotechnology, Konrad-Lorenz-Strasse 20, 3430 Tulln an der Donau, Austria

\* Corresponding author: email: alessandro.pellis@gmail.com, alessandro.pellis@boku.ac.at

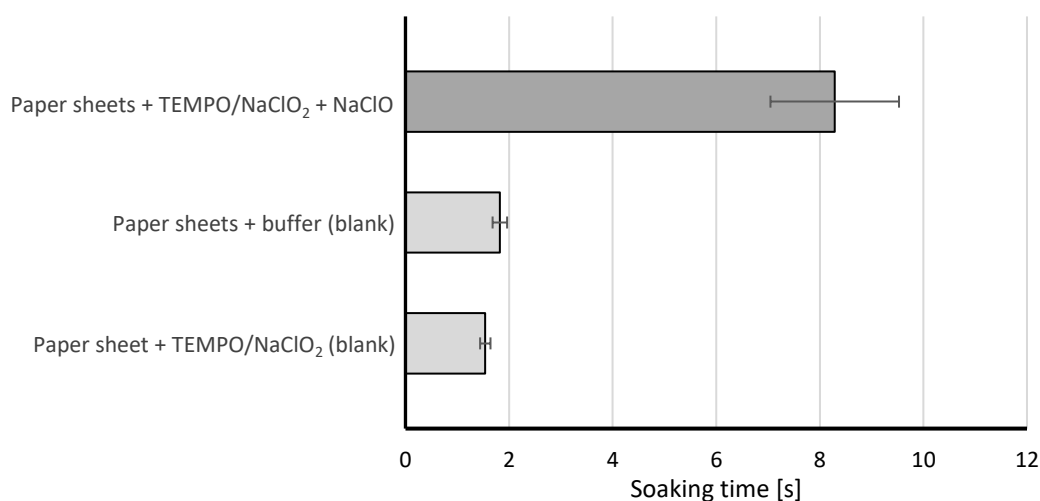

**Figure S1.** Coupling of hydrophobins to oxidized and non-oxidized Whatman No.1 filter paper sheets. Oxidized samples (Paper sheet + TEMPO/NaClO<sub>2</sub> + NaClO) show a higher soaking time than samples which were coupled with hydrophobins but not oxidized before (blanks). All experiments were conducted in triplicates and are presented showing the standard deviation.
